# Supplementary material
Source: PubMed Central journal article supplement (PMC6490176)

# Saturday – September 16, 2017

9:00AM – 5:00PM Arrival/Registration

## ISNN Training Course – “Nutrigenetics in Practice”

Organized by Martin Kohlmeier and Olivia Dong (University of North Carolina)

- 11:00AM – 12:30PM Genetic information for added value in practice  
Primer of genomics terms and principles  
How to read genomic information  
Case study – lactase persistence  
Ethical and legal frameworks
- 12:30PM – 1:30PM Break
- 1:30PM – 2:15PM Nutrients, polymorphisms, and cancer  
Cardiovascular health and salt sensitivity  
Nutrigenetics for optimizing physical performance
- 2:15PM – 3:30PM Criteria for gene variant selection  
Inventory of high-utility gene variants  
Genotype-based nutrition counseling  
Computer support for nutrigenetics in practice

## Special Symposium – “Health Benefits of Prebiotics”

Sponsored by  龍力  
LONGLIVE

- 4:00PM – 4:15PM Opening Remarks
- 4:15PM – 5:10PM David Heber (UCLA)  
*“Prebiotics and Metabolism”*
- 5:10PM – 5:30PM Jennifer Gu (AIDP, Inc.)  
*“Xylooligosaccharides, a Prebiotic Fiber, Modulates Microbiota and Improves Intestinal Function in Subjects with IBS”*
- 5:30PM – 7:00PM Opening Reception  
*(Sponsored by the USC Diabetes and Obesity Research Institute)*

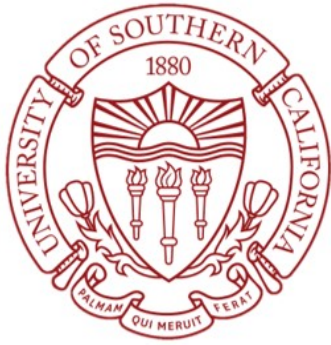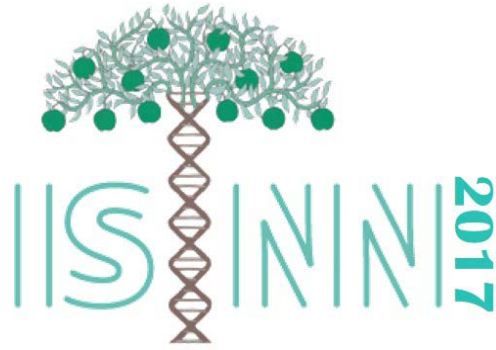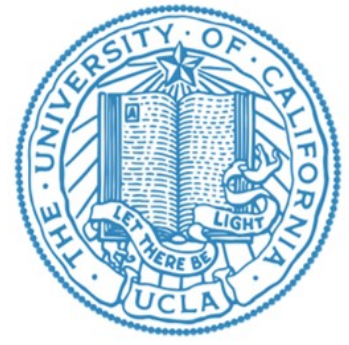

# 11<sup>th</sup> Congress of the International Society of Nutrigenetics/Nutrigenomics (ISNN2017)

## FINAL PROGRAM

**September 16-19, 2017**  
**UCLA Luskin Conference Center and Hotel**  
**Los Angeles, CA, USA**

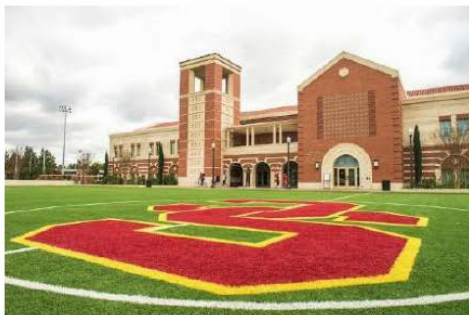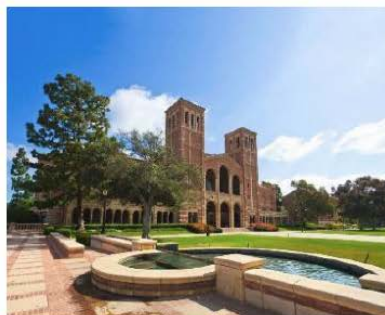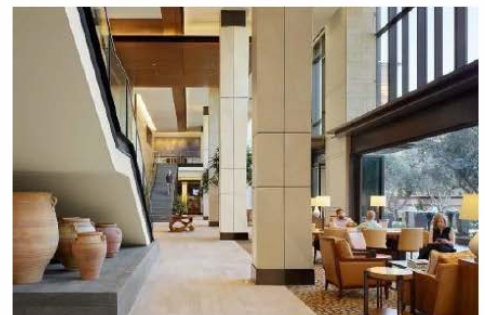

[ISNN2017.org](http://ISNN2017.org)

# Sunday – September 17, 2017

## Session 1: Multi-omics Approaches to Nutrigenetics

- 8:00AM – 8:50AM    **Keynote Speaker: David Heber (UCLA)**  
*“Nutrigenomics and Nutrigenetics: The Next Frontier”*
- 8:50AM – 9:15AM    **A. Jake Lusis (UCLA)**  
*“Pervasive Gene-By-Diet Interactions: A Systems-Based Approach in Mice”*
- 9:15AM – 9:40AM    **David James (University of Sydney)**  
*“Systems Analysis of Insulin Resistance”*
- 9:40AM – 10:10AM    **Coffee Break**
- 10:10AM – 10:35AM    **Jimmy Bell (University of Westminster)**  
*“To Genotype or Not to Genotype: That is the Question”*
- 10:35AM – 11:00AM    **Alfredo Martinez (Universidad de Navarra)**  
*“Omics Applications for Obesity Management”*
- 11:00AM – 11:25AM    **Xu Lin (SIBS, Chinese Academy of Sciences)**  
*“Multi-omics Studies for Nutritional Needs and Metabolic Diseases in Chinese”*
- 11:25AM – 11:50AM    **Hooman Allayee (USC)**  
*“Integrating Genetics with Metabolomics Identifies a Novel Pathway for Cardiovascular Disease with Dietary Implications”*
- 11:50AM – 1:30PM    **Lunch and Poster Session**

# Sunday – September 17, 2017

## Session 2: Longevity, Metabolism, and Cancer

- 1:30PM – 1:55PM Pinchas Cohen (USC)  
*“Nutrigenomics Meets the Mitochondria”*
- 1:55PM – 2:20PM Brian Bennett (Western Human Nutrition Research Center and UC Davis)  
*“Nutrigenetic Interactions and Molecular Mediators of Diet-Induced Metabolic Dysfunction”*
- 2:20PM – 2:45PM William Evans (Duke University)  
*“New Methods for Evaluation of Skeletal Muscle: Sarcopenia Reconsidered”*
- 2:45PM – 3:15PM **Coffee Break**
- 3:15PM – 3:40PM Mariana Stern (USC)  
*“Red Meat and Cancer Risk: Understanding this Association through Nutrigenetic Studies”*
- 3:40PM – 4:05PM Charles Brenner (University of Iowa)  
*“Nicotinamide Riboside: From Discovery to Human Translation”*
- 4:05PM – 4:30PM Joseph Pisegna (VA Greater Los Angeles Healthcare System)  
*“High Protein Diets to Treat Chronic Diseases”*

# Monday – September 18, 2017

## Session 3: Diet and the Microbiome

- 8.30AM – 9:20AM     **Keynote Speaker: Rob Knight (UCSD)**  
*“Shaping our Dynamic Microbiomes for Lifelong Health”*
- 9:20AM – 9:45AM     **Stanley Hazen (Cleveland Clinic)**  
*“Red Meat, Gut Microbiota, and Cardiovascular Disease “*
- 9:45AM – 10:10AM     **Jonathan Braun (UCLA)**  
*“Bioactive Microbiome Metabolites in Chronic Inflammatory Diseases”*
- 10:10AM – 10:40AM     **Coffee Break**
- 10:40AM – 11:05AM     **Sean Adams (USDA and Arkansas Children’s Nutrition Center)**  
*“Xenometabolomics: Observations and Applications”*
- 11:05AM – 11:30AM     **Elaine Hsiao (UCLA)**  
*“Interactions between the Gut Microbiome and Nervous System in Health and Disease”*
- 11:30AM – 11:55AM     **Zhaoping Li (UCLA Center for Human Nutrition)**  
*“Defining the Impact of Dietary Influences on the Microbiome: Challenges and Opportunities”*
- 11:55PM – 1:30PM     **Lunch and Poster Session**



# Monday – September 18, 2017

## Session 4: Industry/Academic Partnerships for Moving the Field Forward

- 1:30PM – 1:50PM Christopher Lynch (National Institute of Diabetes & Digestive & Kidney Diseases)  
*"The NIH Nutrition Research Task Force and Strategic Planning of Nutrition Research at NIH"*
- 1:50PM – 2:10PM John Courtney (American Society of Nutrition)  
*"Enhancing Trust in the Nutrition Science Enterprise"*
- 2:10PM – 2:30PM Orian Shirihai (UCLA)  
*"Impact of Nutrients on Mitochondrial Quality Control"*
- 2:30PM – 2:50PM **Coffee Break**
- 2:50PM – 3:10PM Ari Mayer Mackler (The Wonderful Company)  
*"Interpreting Industry-Funded Nutrition Research: Pitfalls vs. Potential"*
- 3:10PM – 3:30PM Ahmed El-Soheemy (University of Toronto)  
*"Consumer Genetic Testing: What do the Skeptics Say?"*
- 3:30PM – 3:50PM Ray Jiao (Tarcine BioMed, Inc.)  
*"Early Warning System for Cancer Screening and Targeted Nutrition Intervention"*
- 3:50PM – 4:30PM **Round Table Discussion**

# Tuesday – September 19, 2017

## Session 5: Accepted Oral Presentations and Young Investigator Talks

- 8:00AM – 8:15AM William Barrington (UCLA)  
*“Metabolic Responses to Dietary Patterns Differ with Genetic Backgrounds in Mice”*
- 8:15AM – 8:30AM Jie Li (Harbin Medical University)  
*“Prenatal Exposure to Famine and Type 2 Diabetes in Adulthood Across Generations”*
- 8:30AM – 8:45AM Tatiane Fujii (University of São Paulo)  
*“Fat Mass and Obesity Associated (FTO) Polymorphisms Interact with Plasma Polyunsaturated Omega 3 Fatty Acid to Influence Inflammation”*
- 8:45AM – 9:00AM Jieping Yang (UCLA Center for Human Nutrition)  
*“Effects of Prebiotic Fiber Xylo-oligosaccharides in Adenine Induced Nephropathy in Mice”*
- 9:00AM – 9:15AM Vimal Karani (University of Reading)  
*“Evidence for a Genetic Association Between High Milk Consumption and Cardio-Metabolic Traits”*
- 9:15AM – 9:30AM Coffee Break

# Tuesday – September 19, 2017

## Session 6: Translational/Educational Aspects and the Future of Medicine

- 9:30AM – 9:55AM Ronald Krauss (Children’s Hospital Oakland Research Institute)  
*“Prospects for Clinical Translation of Nutrigenomics in Cardiometabolic Disease: Lessons from Statin Pharmacogenomics”*
- 9:55AM – 10:20AM Michael Goran (USC)  
*“Sugars, Genes and the Obesogenic Environment: The Perfect Storm for Non-Alcoholic Fatty Liver Disease in Hispanics”*
- 10:20AM – 10:45AM Karin Michels (UCLA)  
*“Epigenetics and Microbiome as Mediators of Diet and Development”*
- 10:45AM – 11:10AM Martin Kohlmeier (University of North Carolina)  
*“Establishing ISNN Guidelines for Genotype-Specific Nutrition Targets”*
- 11:10AM – 11:30AM **Coffee Break**
- 11:30AM – 11:55AM Kurt Hong (USC)  
*“Nutrition, Diet, and Biology of Aging”*
- 11:55AM – 12:20PM Raffaele De Caterina (G. d’Annunzio University)  
*“The ISNN Textbook Initiative: Principles of Nutrigenetics and Nutrigenomics”*
- 12:20PM – 12:45PM Vijaya Surampudi (UCLA)  
*“Personalized Nutrition: Creating a Lifetime of Wellness”*
- 12:45PM – 1:00PM **Concluding Remarks and Adjourn**



# Thank you to all our ISNN2017 Sponsors!!!

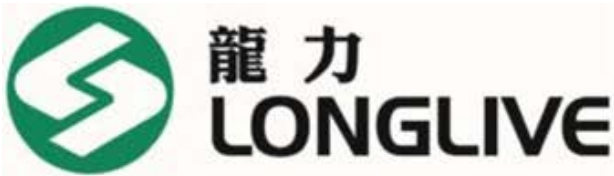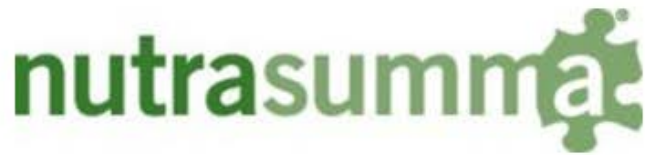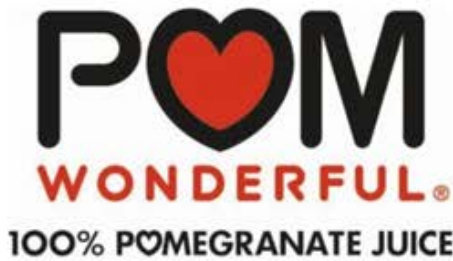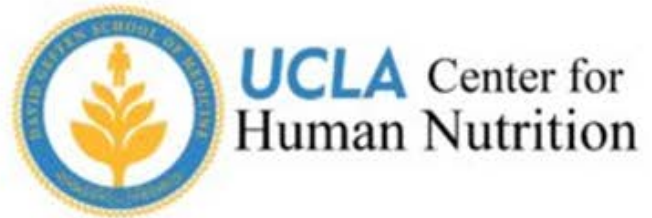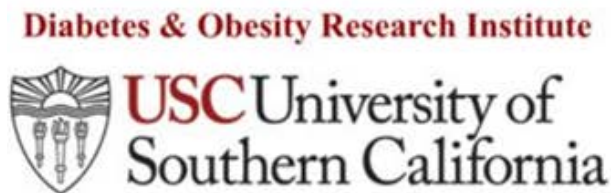

Keck School of  
Medicine of **USC**

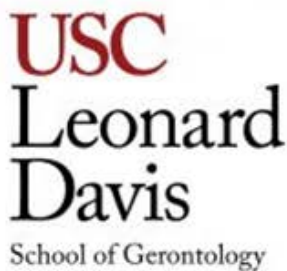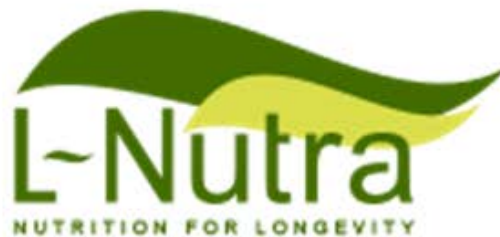

Chinese Nutrition Society

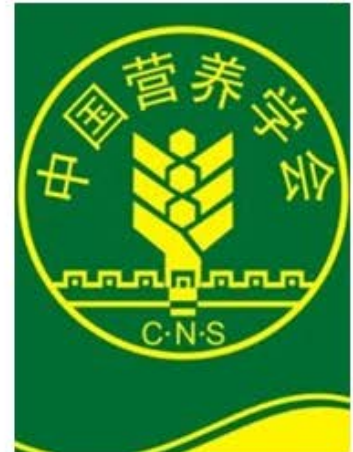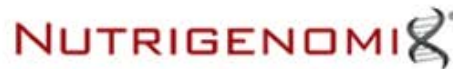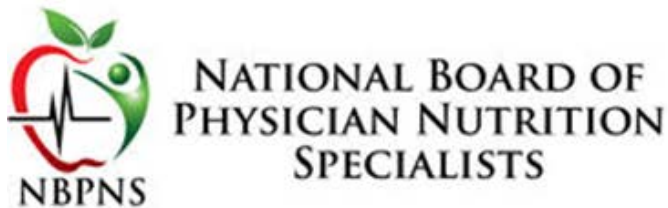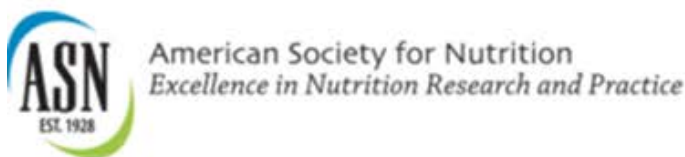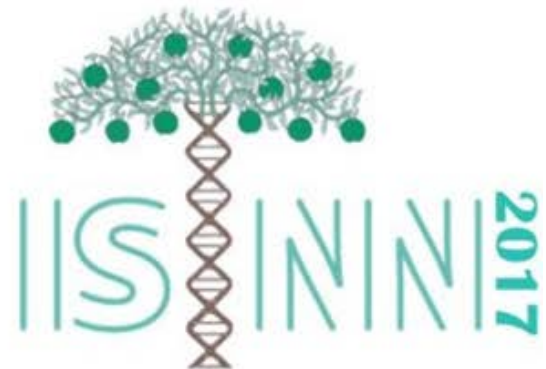

Supplement: NIHMS1010826-supplement-supplement.pdf [file NIHMS1010826-supplement-supplement.pdf]
